# Supplementary material
Source: PubMed Central journal article supplement (PMC2739410)
Supplement: NIHMS115217-supplement-01.pdf [file NIHMS115217-supplement-01.pdf]

**Table 1**

Suggested presentation of voucher data using the terminology proposed, combined with information on preservation status

| Taxon                                           | Accession No. | Voucher                                                                          |
|-------------------------------------------------|---------------|----------------------------------------------------------------------------------|
| <i>Dendronotus frondosus</i> (Ascanius, 1774)   | AJ225185      | ND99-031: hologenophore <sup>b,c</sup><br>ND99-032: paragenophore <sup>a,d</sup> |
| <i>Protopelagonemertes</i> sp. 544              | AJ496324      | JLN-544-1: hologenophore <sup>e,f</sup>                                          |
| <i>Scleraulophorus cephalatus</i> Karling, 1940 | AF167423      | SMNH 99999: illustrations <sup>g,h</sup>                                         |
| <i>Silene reinwardtii</i> Roth                  | EF061375      | Oxelman 2391 UPS:<br>progenophore <sup>i</sup>                                   |
| <i>Streptococcus phocae</i>                     | AJ511670      | CCUG 35103: isogenophore <sup>j</sup>                                            |
